# Supplementary material
Source: publisher figshare collection journal article supplement (https://tandf.figshare.com/ndownloader/files/31581148)
Supplement: Supplementary file 1 [file 31581148]

## APPENDIX A

**Table A1: List of interviews**

| Interview | Description of the firm/organization | Place                 | Date          |
|-----------|--------------------------------------|-----------------------|---------------|
| 1         | Upstream service provider            | Singapore             | 29 Sept. 2016 |
| 2         | Upstream service provider            | Jakarta, Indonesia    | 14 Mar. 2017  |
| 3         | Upstream service provider            | Jakarta, Indonesia    | 20 Mar. 2017  |
| 4         | Lubricant manufacturer               | Haiphong, Vietnam     | 4 May 2017    |
| 5         | Major oil company                    | Singapore             | 16 Nov. 2016  |
| 6         | Major oil company                    | Jakarta, Indonesia    | 9 Mar. 2017   |
| 7         | Major oil company                    | Singapore             | 21 Sept. 2016 |
| 8         | Infrastructure developer             | Jakarta, Indonesia    | 9 Mar. 2017   |
| 9         | Major oil company                    | Balikpapan, Indonesia | 31 Mar. 2017  |
| 10        | Upstream service provider            | Buenos Aires          | 3 May 2017    |
| 11        | Major oil company                    | Buenos Aires          | 27 Apr. 2017  |
| 12        | Major oil company                    | Buenos Aires          | 5 May 2017    |
| 13        | Upstream service provider            | Buenos Aires          | 4 Dec. 2017   |
| 14        | Upstream service provider            | Buenos Aires          | 14 Dec. 2017  |
| 15        | Upstream service provider            | Allen, Argentina      | 28 Nov. 2017  |
| 16        | Local business association           | Neuquén, Argentina    | 23 Nov. 2017  |
| 17        | Private consultant                   | Buenos Aires          | 5 May 2017    |

|    |                        |                       |              |
|----|------------------------|-----------------------|--------------|
| 18 | Integrated oil company | Buenos Aires          | 7 May 2017   |
| 19 | Public authorities     | Cipolletti, Argentina | 28 Nov. 2017 |
| 20 | Major oil company      | Buenos Aires          | 5 May 2017   |
| 21 | Integrated oil company | Cape Town             | 11 Aug. 2016 |
| 22 | Operator of the SBIDZ  | Cape Town             | 8 Aug. 2016  |
| 23 | Major oil company      | Cape Town             | 11 Aug. 2016 |
| 24 | Oil and gas lobby      | Cape Town             | 5 Aug. 2016  |
| 25 | Major oil company      | Cape Town             | 3 Nov. 2017  |
| 26 | Major oil company      | Cape Town             | 2 Nov. 2017  |
| 27 | Exploration firm       | Cape Town             | 2 Nov. 2017  |
| 28 | Integrated oil company | Buenos Aires          | 16 May 2017  |
